# Supplementary material for: Exploiting the interaction between halloysite and charged PNAs for their controlled release
Source: Royal Society of Chemistry journal article supplement (doi:10.1039/d3tb00637a), 2023-01-01
Supplement: d3tb00637a1.pdf [file d3tb00637a1.pdf]

## SUPPORTING INFORMATION

### **Exploiting the interaction between halloysite and charged PNAs for their controlled release**

Serena Riela,<sup>a</sup> Raquel de Melo Barbosa,<sup>b</sup> Ana Borrego-Sánchez,<sup>c</sup> Silvia Cauteruccio,<sup>d,\*</sup> Marina Massaro,<sup>a,\*</sup> C. Ignacio Sainz-Díaz,<sup>e</sup> Rita Sánchez-Espejo<sup>b</sup>, César Viseras-Iborra,<sup>b,e</sup> and Emanuela Licandro<sup>d</sup>

<sup>a</sup> *Department of Biological, Chemical and Pharmaceutical Sciences and Technologies, University of Palermo Viale delle Scienze, Ed. 17 90128 Palermo, Italy. E-mail: marina.massaro@unipa.it*

<sup>b</sup> *Department of Pharmacy and Pharmaceutical Technology, Faculty of Pharmacy, University of Granada, Campus of Cartuja, 18071 s/n, Granada, Spain.*

<sup>c</sup> *Instituto de Ciencia Molecular, Universitat de València, Carrer del Catedrático José Beltrán Martínez 2, 46980 Paterna, Spain.*

<sup>d</sup> *Department of Chemistry, University of Milan, 20133 Milan, Italy- E-mail: silvia.cauteruccio@unimi.it.e*

<sup>e</sup> *Andalusian Institute of Earth Sciences, CSIC-UGR, Avenida de las Palmeras 4, 18100, Armilla, Granada, Spain.*

Total number of pages: 9

Total number of figures: 7

## TABLE OF CONTENT

|                                                                                        |    |
|----------------------------------------------------------------------------------------|----|
| 1. UPLC and HR-ESI <sup>+</sup> mass analyses of PNA tetramers <b>1–3</b> .....        | S3 |
| 2. TEM images of HNTs/ <b>1</b> , HNTs/ <b>2</b> and HNTs/ <b>3</b> nanomaterials..... | S3 |

# 1. UPLC and HR-ESI mass analyses

UPLC-PAD trace of tetramer **1** measured at 260 nm (above) and HR-ESI<sup>+</sup> MS spectrum of the corresponding peak (below).

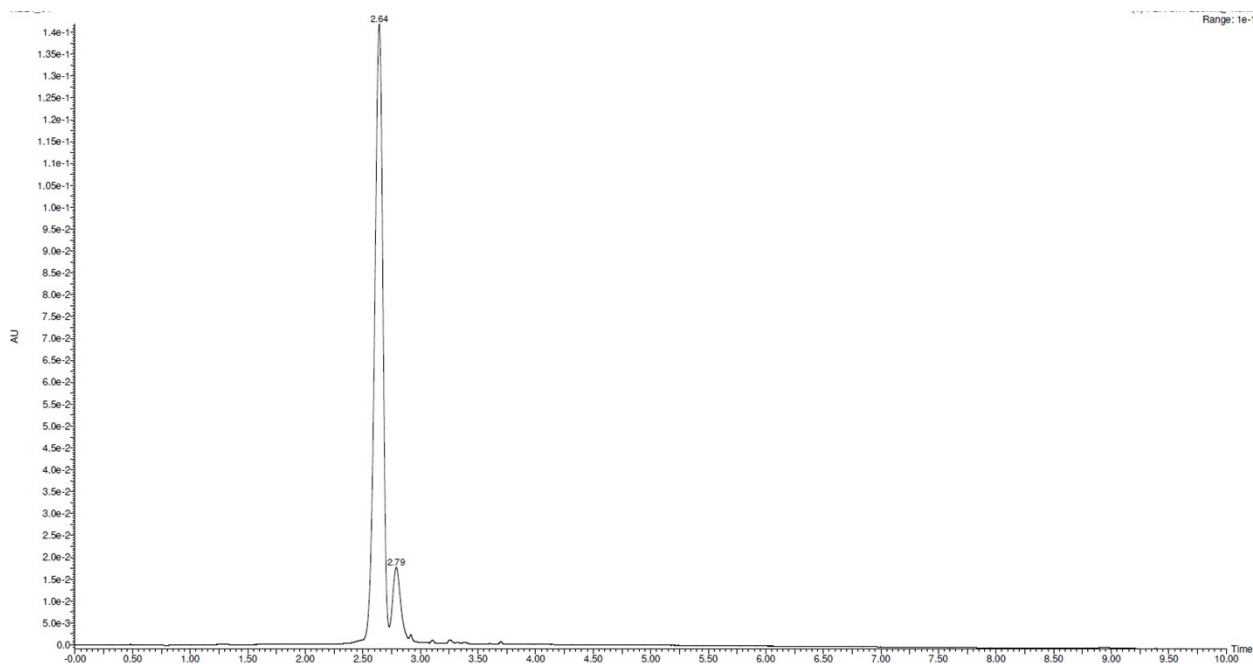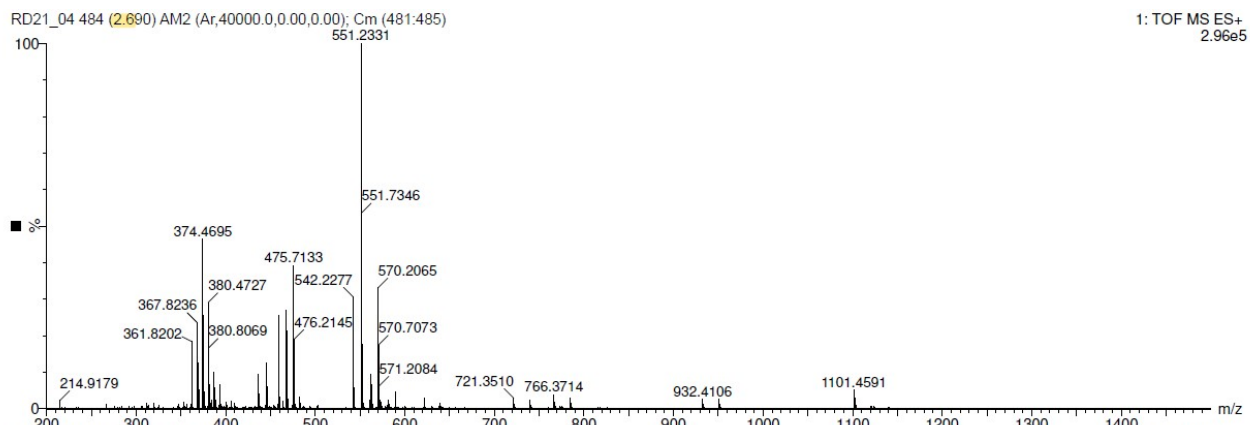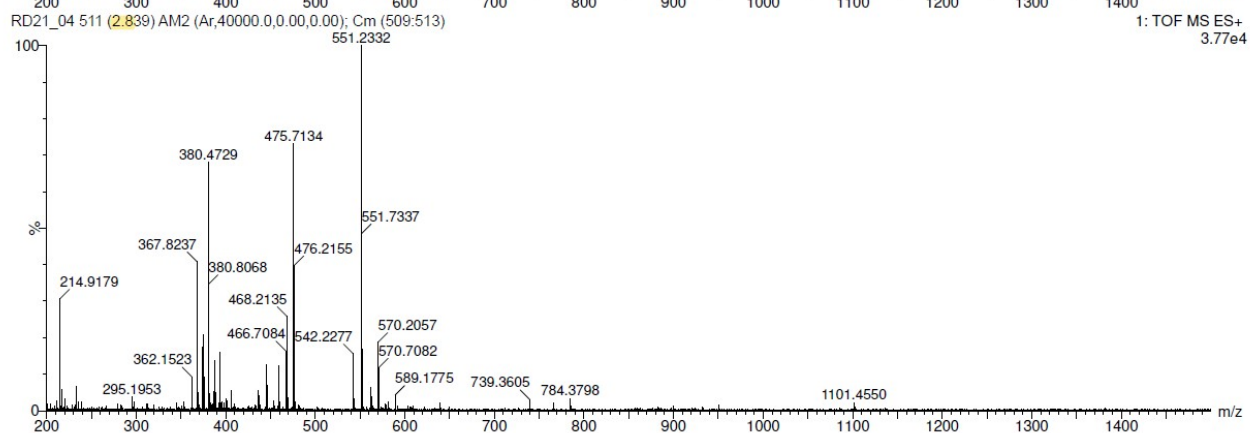

HR-ESI<sup>+</sup> MS/MS spectrum for ion with m/z 1101.64.

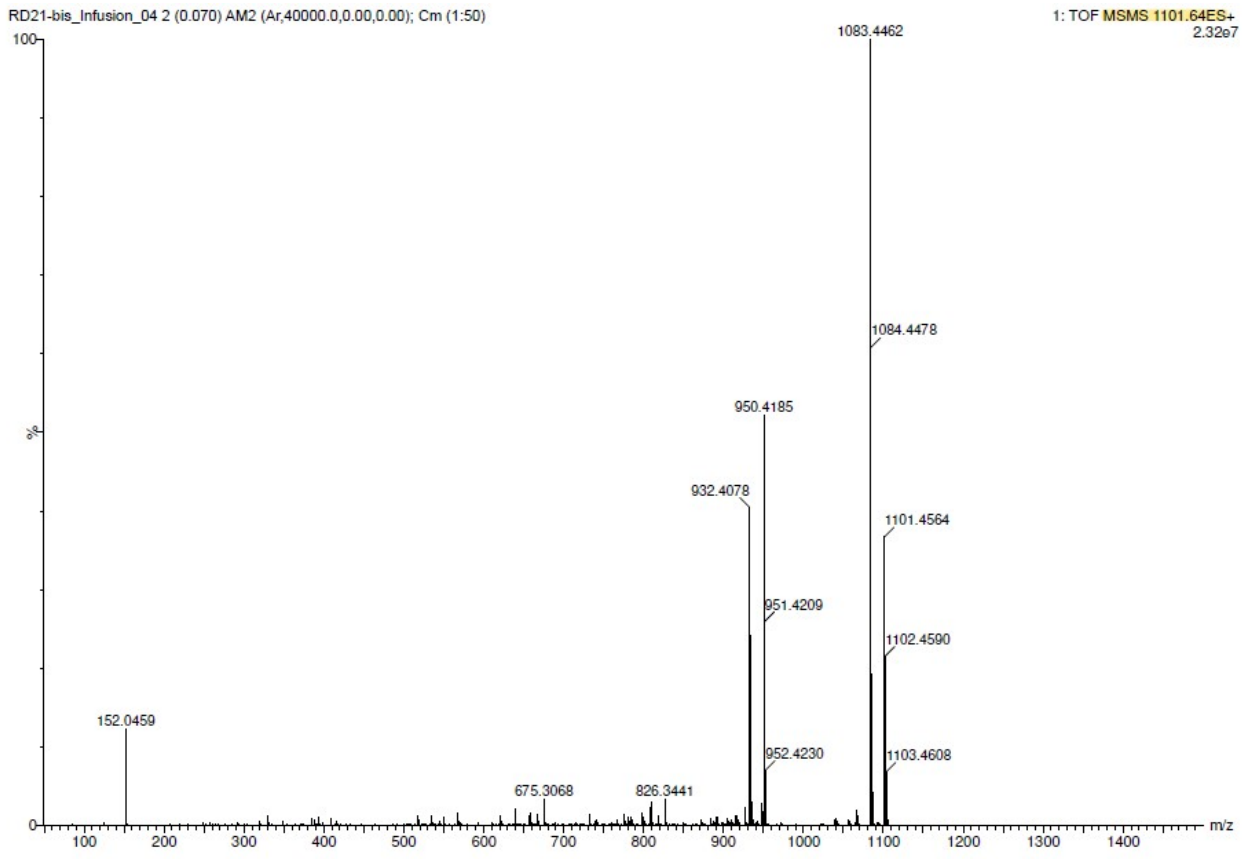

UPLC-PAD trace of tetramer **2** measured at 260 nm (above) and HR-ESI<sup>+</sup> MS spectrum of the corresponding peak (below).

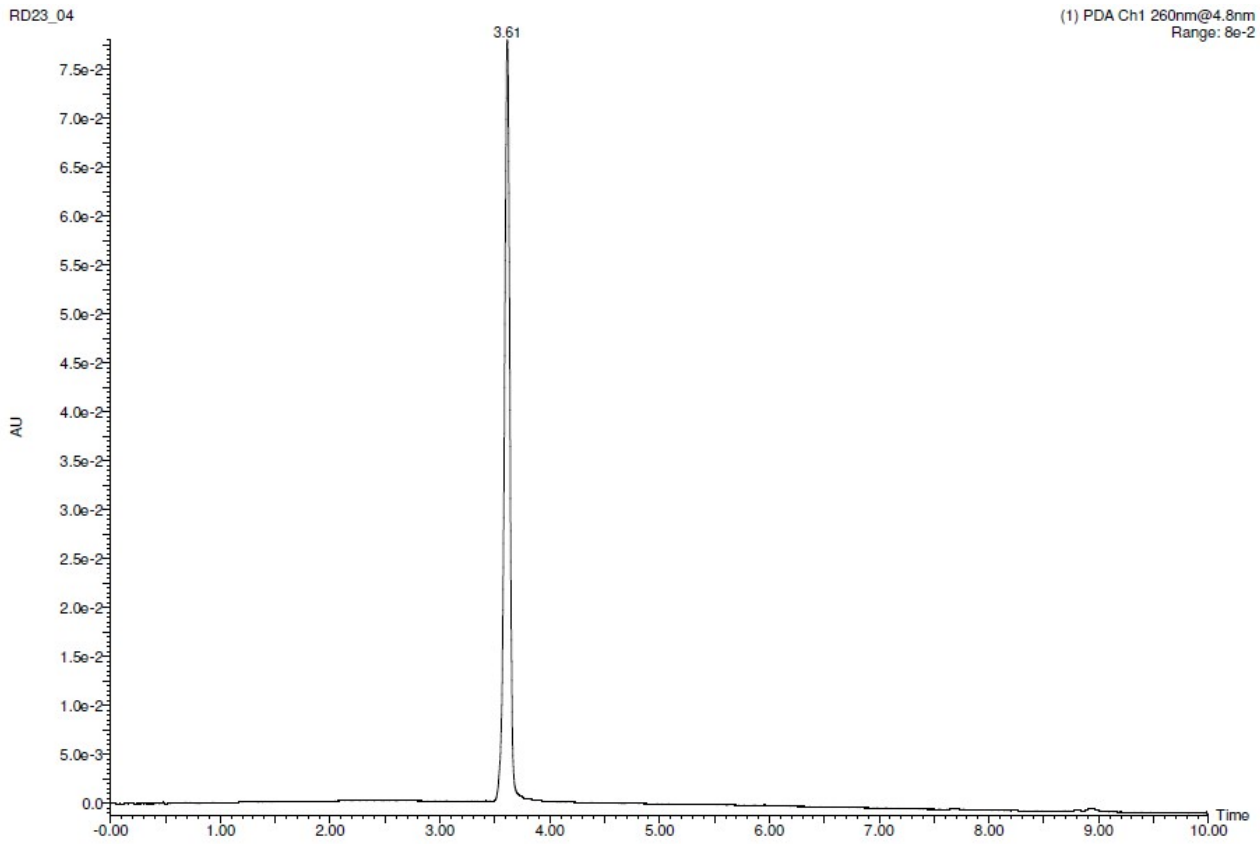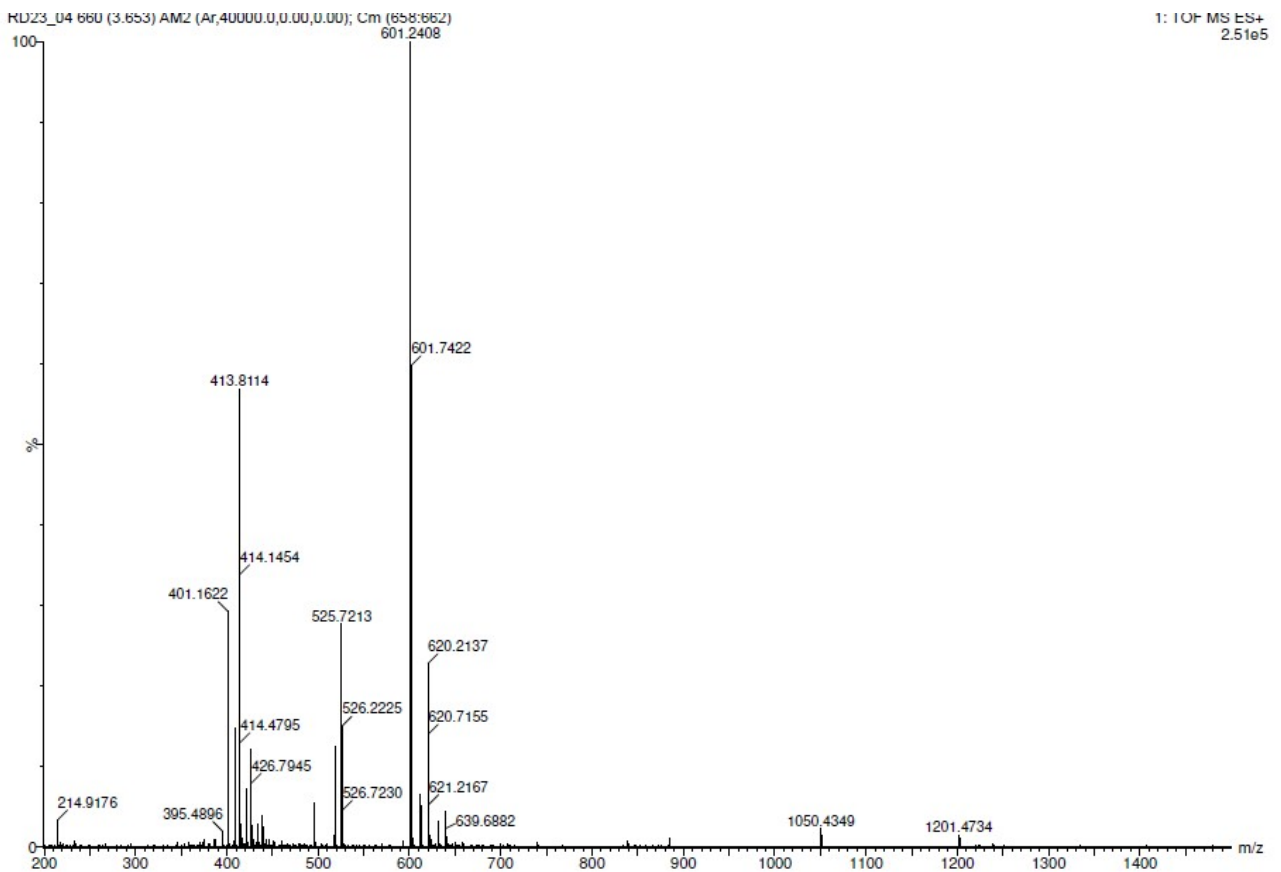

HR-ESI<sup>+</sup> MS/MS spectrum for ion with m/z 1201.67.

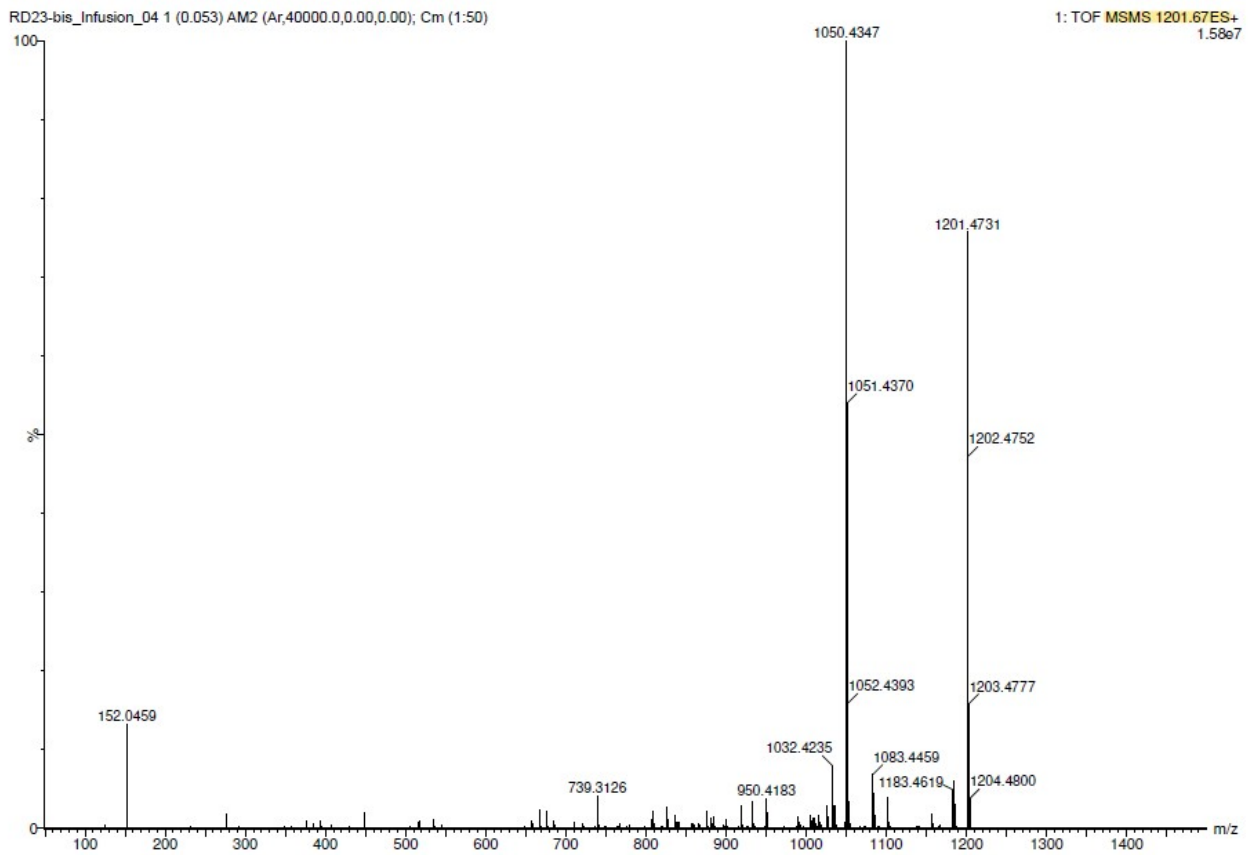

UPLC-PAD trace of tetramer **3** measured at 260 nm (above) and HR-ESI<sup>+</sup> MS spectrum of the corresponding peak (below).

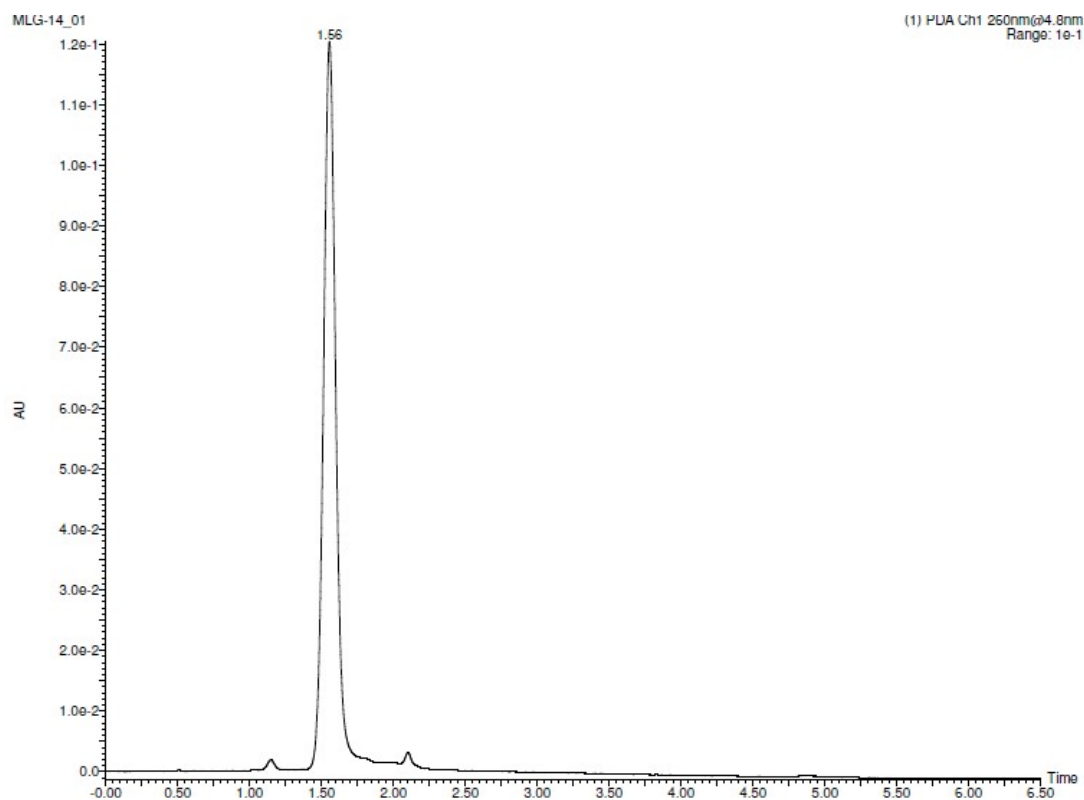

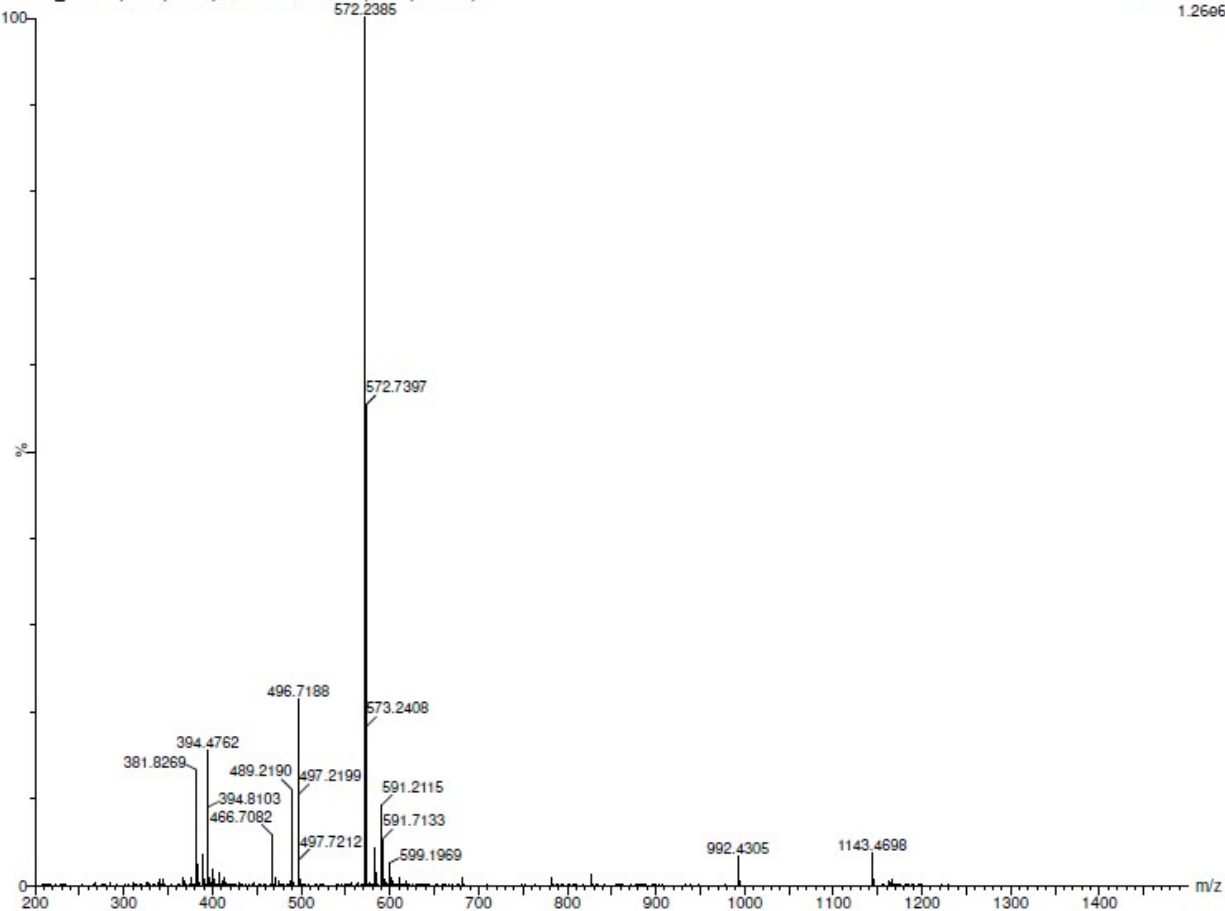



HR-ESI<sup>+</sup> MS/MS spectrum for ion with m/z 1143.66.

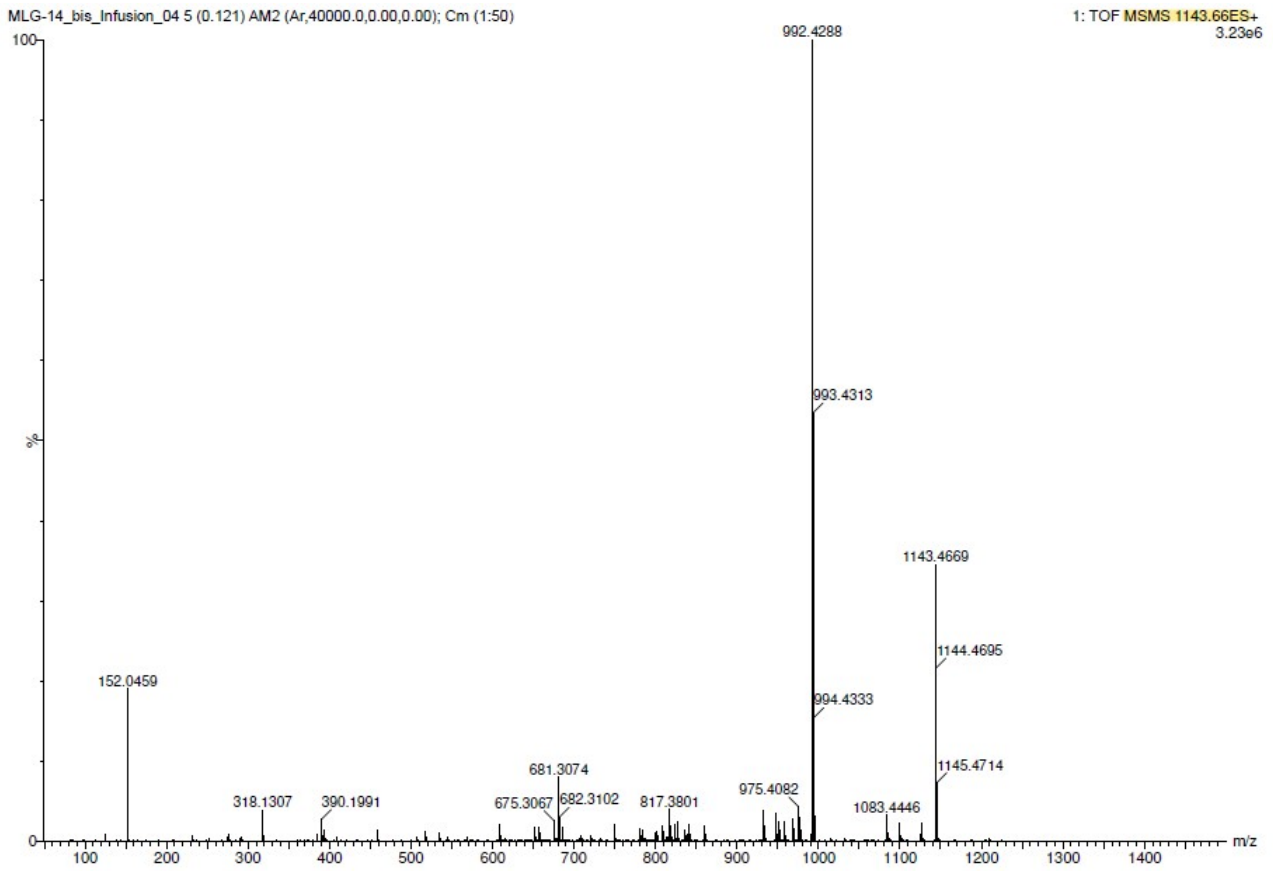

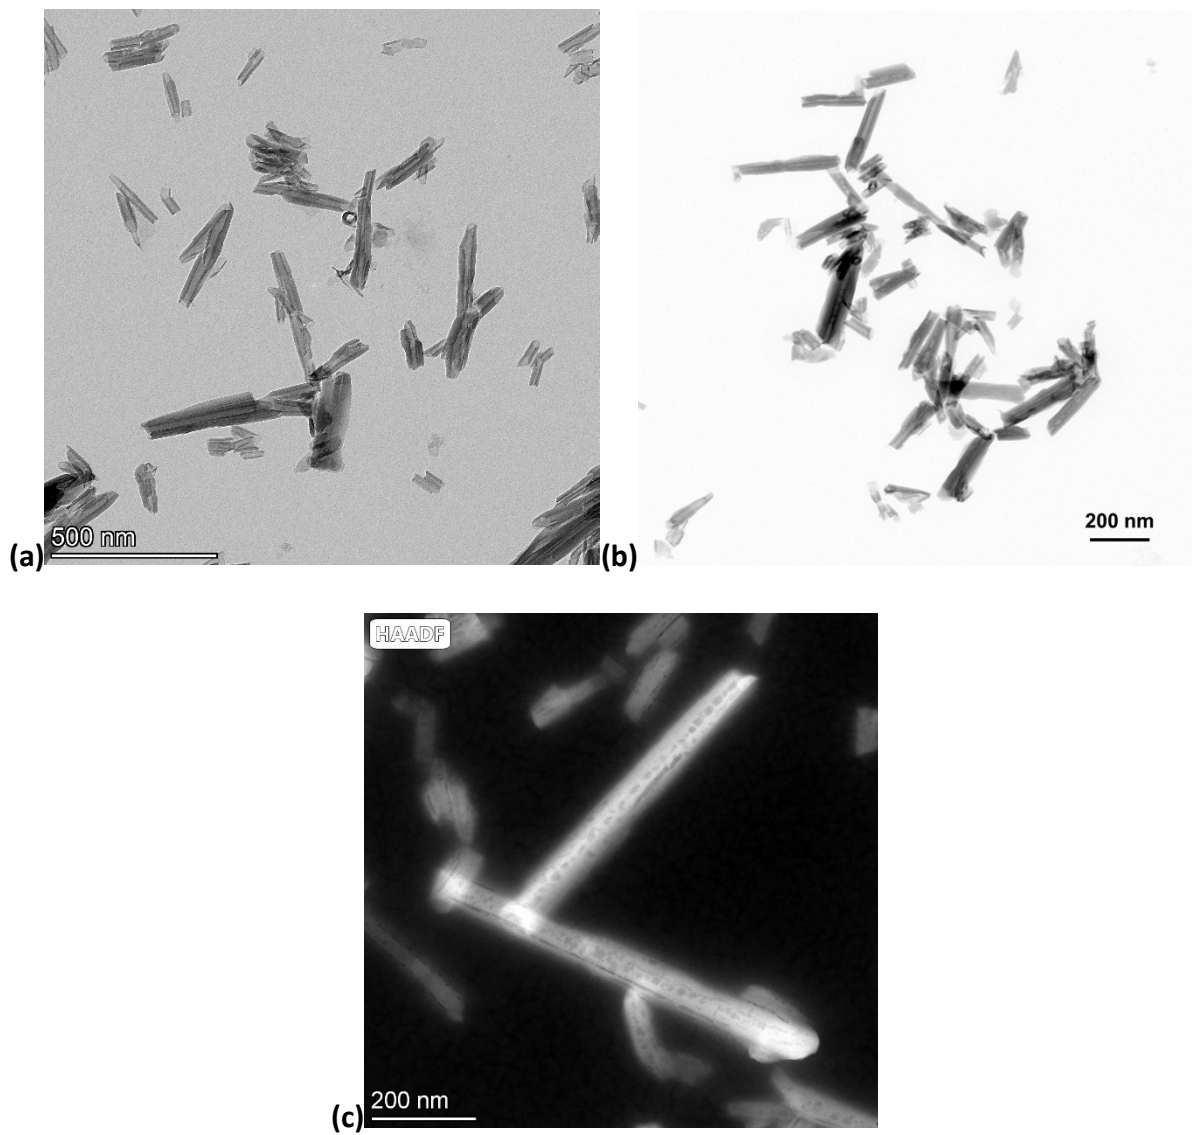

**Figure S.1.** TEM images of (a) HNTs/1, (b) HNTs/2 and (c) HNTs/3 nanomaterials.
